# Supplementary material for: Inhibiting PLA2G7 reverses the immunosuppressive function of intratumoral macrophages and augments immunotherapy response in hepatocellular carcinoma
Source: PubMed Central journal article supplement — J Immunother Cancer. 2024 Jan 25;12(1):e008094. doi: 10.1136/jitc-2023-008094 (PMC10824072; doi:10.1136/jitc-2023-008094), 2024-01-25
Supplement: jitc-2023-008094supp001.pdf [file jitc-2023-008094supp001.pdf]

## Supplementary Figures

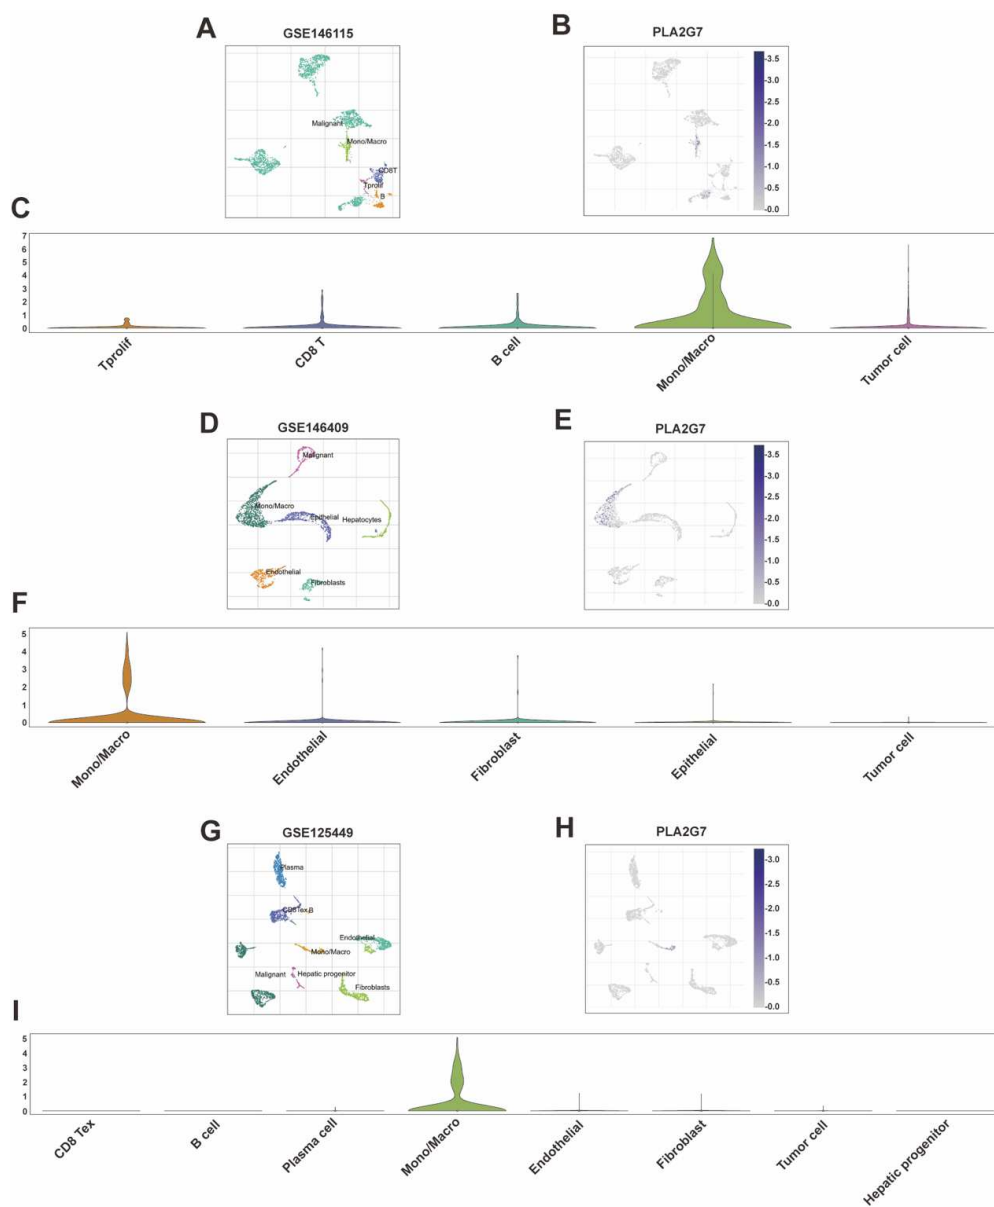**Supplementary Figure 1. PLA2G7 is mainly expressed in macrophages in HCC. (A-C)**

Analysis of the single data from GSE146115 using the TISCH tool. t-SNE plots for distinct cell subsets (A). t-SNE plot of all single cells colored by the expression level of PLA2G7 (B). Violin plot displaying the expression levels of PLA2G7 in distinct cell subsets (C). (D-F) Analysis of the single data from GSE146409 using the TISCH tool. t-SNE plots for distinct cell subsets (D). t-

SNE plot of all single cells colored by the expression level of PLA2G7 (E). Violin plot displaying the expression levels of PLA2G7 in distinct cell subsets (F). (G-I) Analysis of the single data from GSE125449 using the TISCH tool. t-SNE plots for distinct cell subsets (G). t-SNE plot of all single cells colored by the expression level of PLA2G7 (H). Violin plot displaying the expression levels of PLA2G7 in distinct cell subsets (I). HCC: hepatocellular carcinoma; TISCH: Tumor Immune Single-cell Hu; t-SNE: t-Distributed Stochastic Neighbor Embedding.

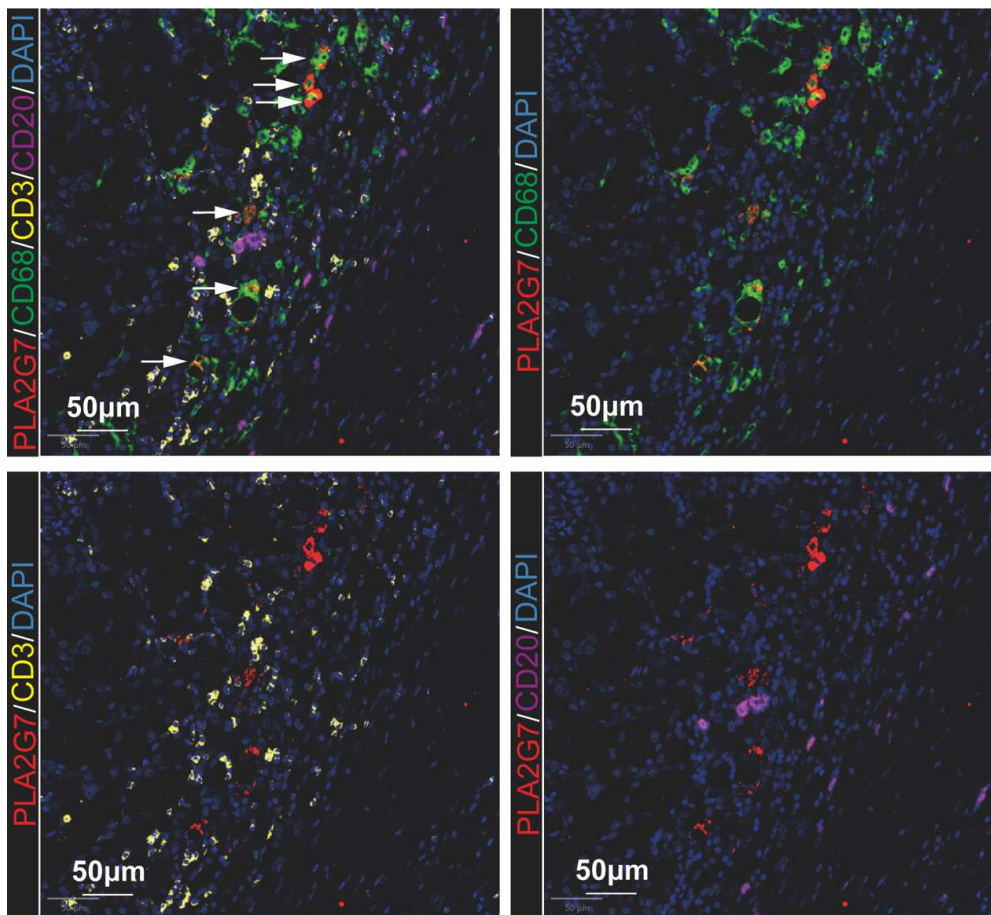

**Supplementary Figure 2. Multiplex immunofluorescence analysis for PLA2G7, CD68, CD3, and CD20 markers in human HCC tissues. Scale bar: 50 µm.**

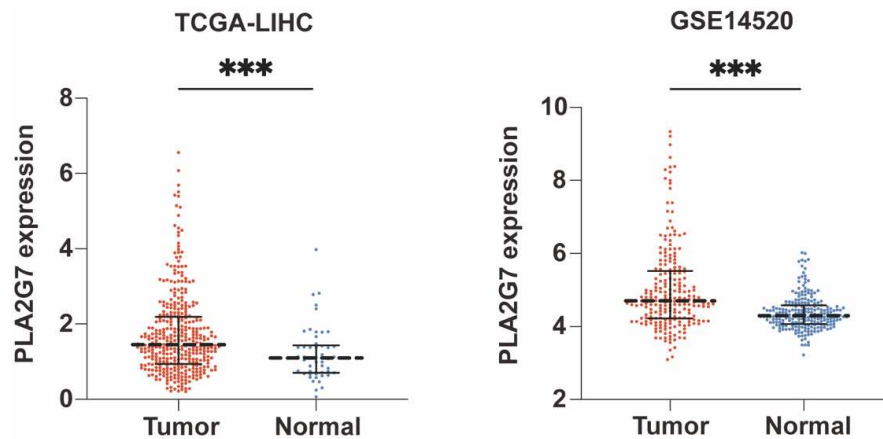

**Supplementary Figure 3. The mRNA levels of PLA2G7 in HCC tissues versus peritumor tissues in TCGA-LIHC and GSE14520 cohorts.** Statistical analysis was performed using the Mann-Whitney U test. Data was presented as median with IQR. \*\*\* $p < 0.001$ . HCC: hepatocellular carcinoma; TCGA-LIHC, the cancer genome atlas liver hepatocellular carcinoma; IQR: interquartile range.

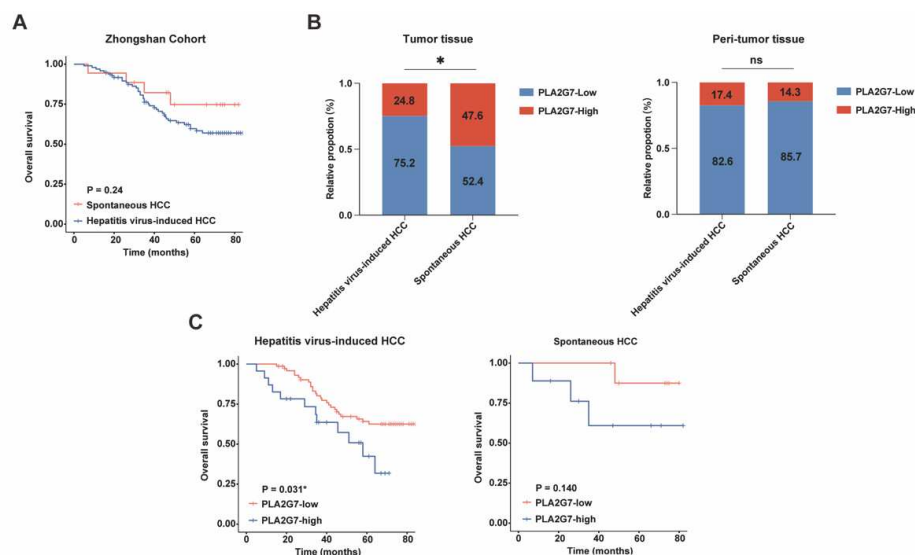

**Supplementary Figure 4. Subgroup analysis on HCC patients with diverse oncogenic etiologies in the Zhongshan cohort.** (A) OS curves comparing hepatitis virus-induced HCC and spontaneous HCC (n=115). (B) IHC expression pattern of PLA2G7 in tumor HCC (left panel) or

peritumor (right panel) tissues from hepatitis virus-induced HCC and spontaneous HCC (n=130). (C) OS curves for hepatitis virus-induced (n=97, left panel) or spontaneous (n=18, right panel) HCC patients stratified by low and high expression of PLA2G7. Statistical analysis was performed using the log-rank test in (A) and (C), and the Chi-square test in (B). ns, no significance; \* $p < 0.05$ . HCC: hepatocellular carcinoma; OS: overall survival; IHC: immunohistochemistry.

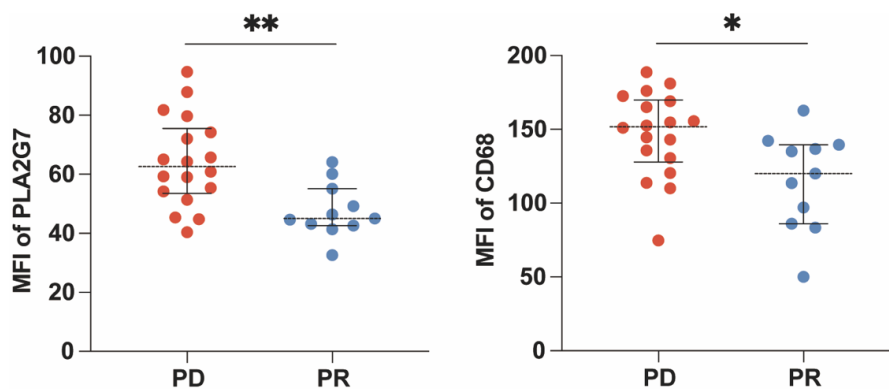

**Supplementary Figure 5. The MFI of PLA2G7 and CD68 in tumor tissues from HCC**

**patients with PD and PR.** Statistical analysis was performed using the Mann-Whitney U test.

Data was presented as median with IQR. \* $P < 0.05$ , \*\* $p < 0.01$ . MFI: Mean Fluorescence Intensity; HCC: hepatocellular carcinoma; PD: progressive disease; PR: partial response; IQR: interquartile range.

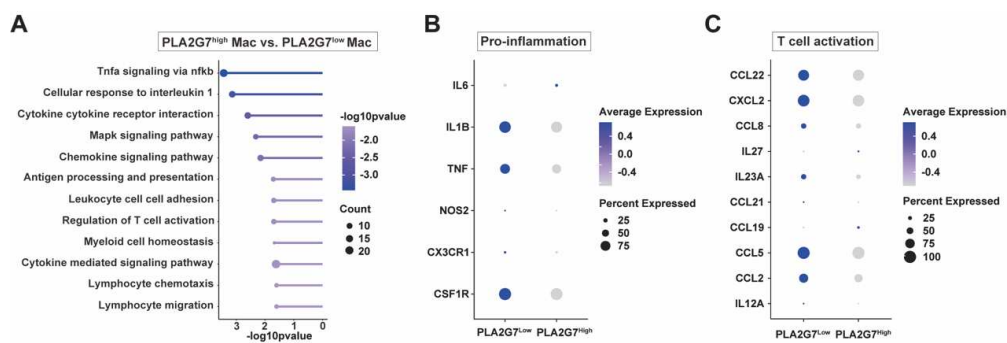

**Supplementary Figure 6. PLA2G7 preserves the immunosuppressive phenotype in**

**macrophages.** (A) GSEA enrichment analysis of PLA2G7<sup>high</sup> vs. PLA2G7<sup>low</sup> macrophages in Dataset 1. (B-C) Bubble plots showing the expression levels of representative marker genes for pro-inflammation and T cell activation in PLA2G7<sup>low</sup> and PLA2G7<sup>high</sup> macrophages. GSEA: Gene Set Enrichment Analysis.

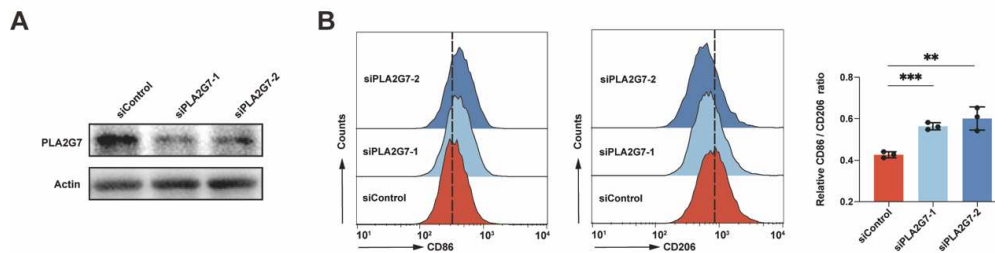

**Supplementary Figure 7. Silencing PLA2G7 induces M1 polarization of human macrophages.**

(A) Western blot analysis of PLA2G7 in TCM-educated THP-1-differentiated macrophages transfected with control siRNA or siRNA targeting PLA2G7.  $\beta$ -actin was used as loading control. (B) Flow cytometric analysis of CD86 and CD206 on TCM-education THP-1-differentiated macrophages transfected with control siRNA or siRNA targeting PLA2G7. Student's t-test. Data was presented as mean with SD. \*\* $p < 0.01$ , \*\*\* $p < 0.001$ . TCM: tumor-conditioned media; siRNA: small interfering RNA.

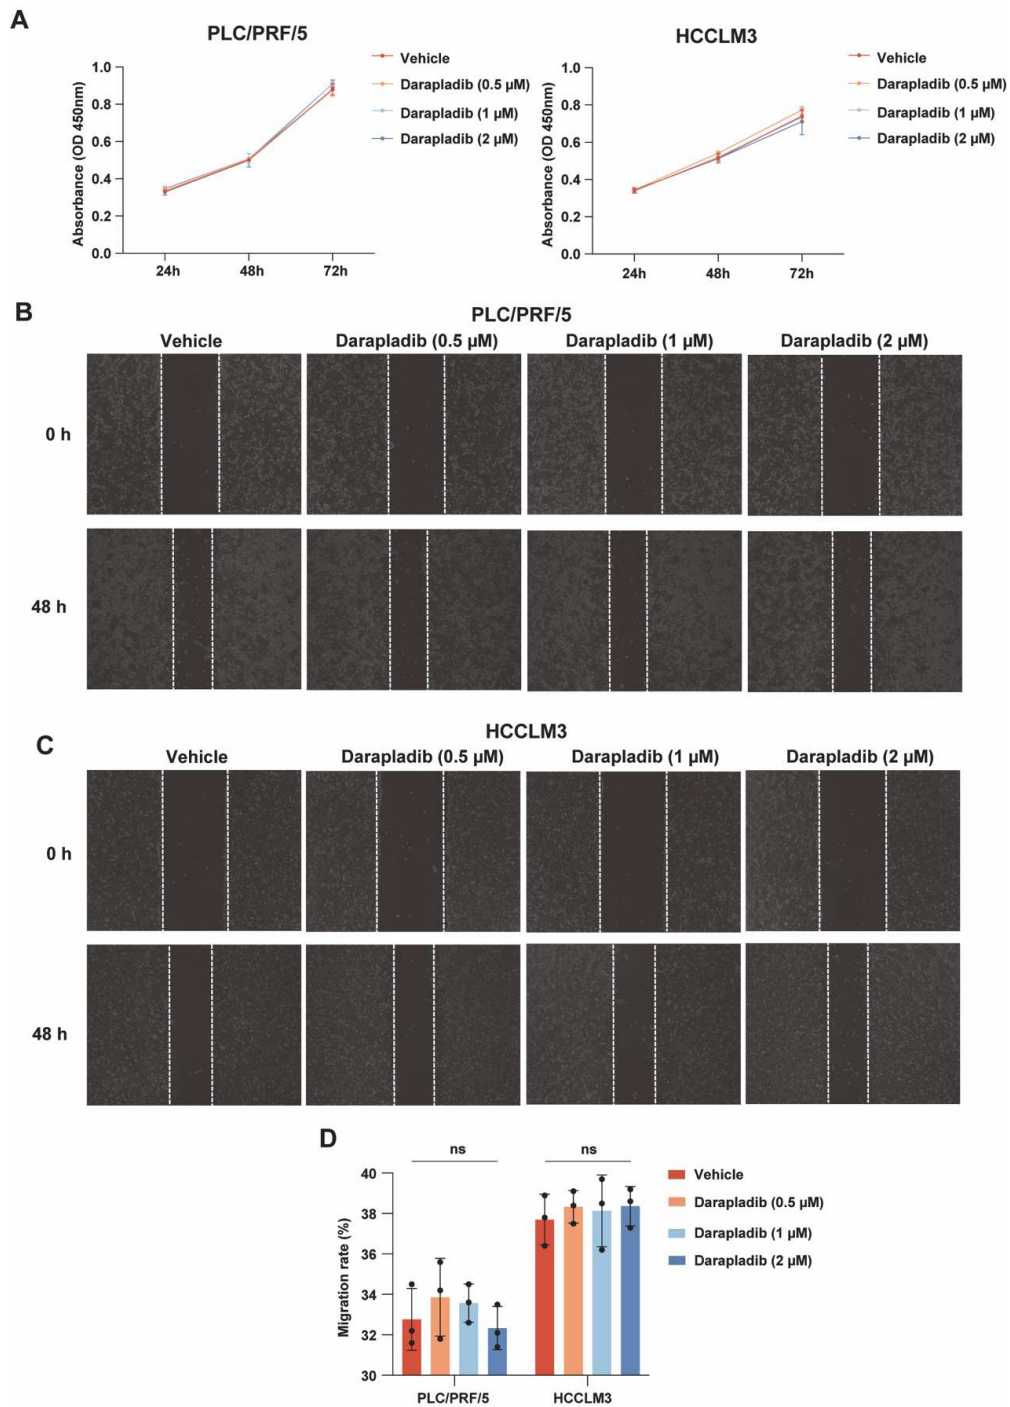

**Supplementary Figure 8. Treatment with Darapladib did not impact the proliferation and migration of human HCC cells.** (A) Cell proliferation in PLC/PRF/5 (left panel) and HCCLM3 (right panel) cells treated with various concentrations of Darapladib was assessed using a CCK-8 assay. (B-D) A wound healing migration assay was performed to evaluate the migration ability of



human HCC cells treated with various concentrations of Darapladib. One-way ANOVA with a post hoc LSD test. Data was presented as mean with SD. ns, no significance. HCC: hepatocellular carcinoma; SD: standard deviation.

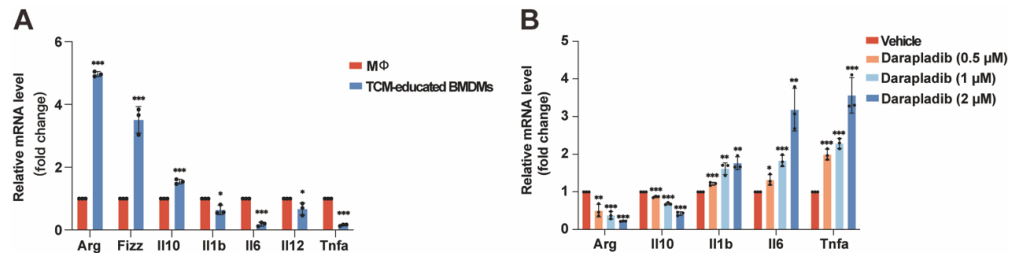

**Supplementary Figure 9. qPCR analysis of the mRNA levels of immune-regulatory genes in BMDMs.** (A) The mRNA levels of immune-regulatory genes in MΦ (untreated BMDMs) versus TCM-educated BMDMs. (B) The mRNA levels of immune-regulatory genes in TCM-educated BMDMs treated with either Darapladib (0.5 μM, 1 μM, and 2 μM) or vehicle. Statistical analysis was performed using the Student's t-test. Data was presented as mean with SD. \* $p < 0.05$ , \*\* $p < 0.01$ , \*\*\* $p < 0.001$ . BMDM: bone marrow-derived macrophage; TCM: tumor condition medium; SD: standard deviation.

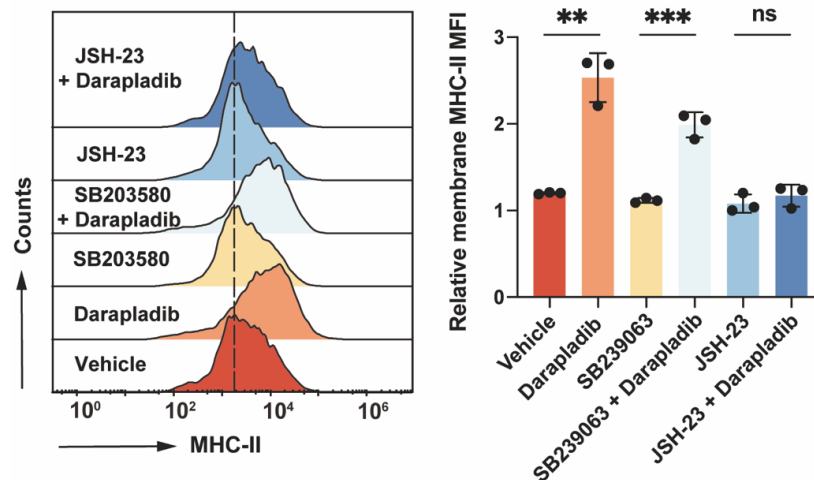

**Supplementary Figure 10. Flow cytometric analysis of membrane MHC-II on TCM-educated**

**BMDMs.** The cells were treated with either Darapladib (2  $\mu$ M), SB203580 (10  $\mu$ M), SB203580 (10  $\mu$ M) + Darapladib (2  $\mu$ M), JSH-23 (10  $\mu$ M), JSH-23 (10  $\mu$ M) + Darapladib (2  $\mu$ M), or vehicle. Representative flow cytometry data (left panel) and the statistical diagram (right panel) are shown. Student's t-test. Data was presented as mean with SD. ns, no significance; \*\* $p < 0.01$ , \*\*\* $p < 0.001$ . TCM: tumor condition medium; BMDM: bone marrow-derived macrophage; SD: standard deviation; MFI: mean fluorescence intensity.

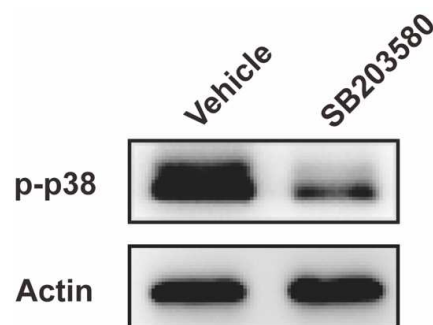

**Supplementary Figure 11.** Western blot analysis of p-p38 in macrophages treated with either SB203580 or vehicle.

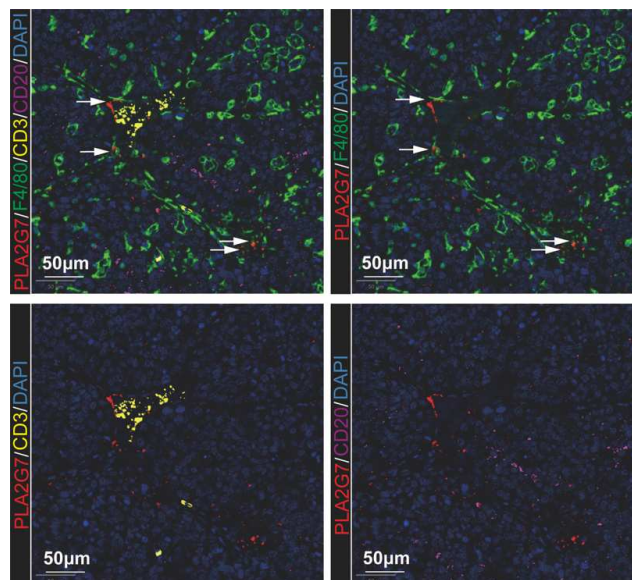

**Supplementary Figure 12.** Multiplex immunofluorescence analysis for PLA2G7, F4/80, CD3, and CD20 markers in murine orthotopic HCC tissues. Scale bar: 50  $\mu$ m.



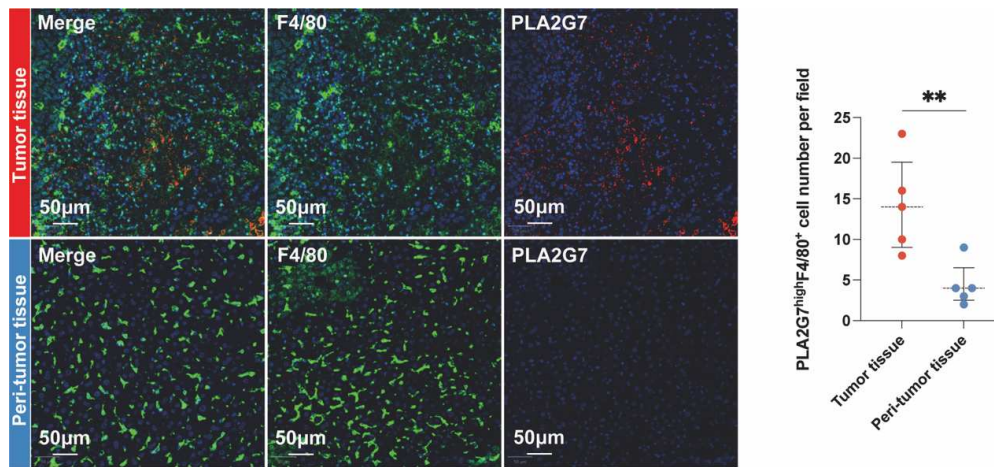

**Supplementary Figure 13. Multiplex immunofluorescence analysis for PLA2G7 and F4/80 in tumor or peritumor tissues from murine orthotopic HCC.** Representative images and statistical diagram illustrating PLA2G7<sup>high</sup> F4/80<sup>+</sup> cells are shown. Scale bar: 50 μm. Student's t-test. Data was presented as mean with SD. \*\*p<0.01. HCC: hepatocellular carcinoma.

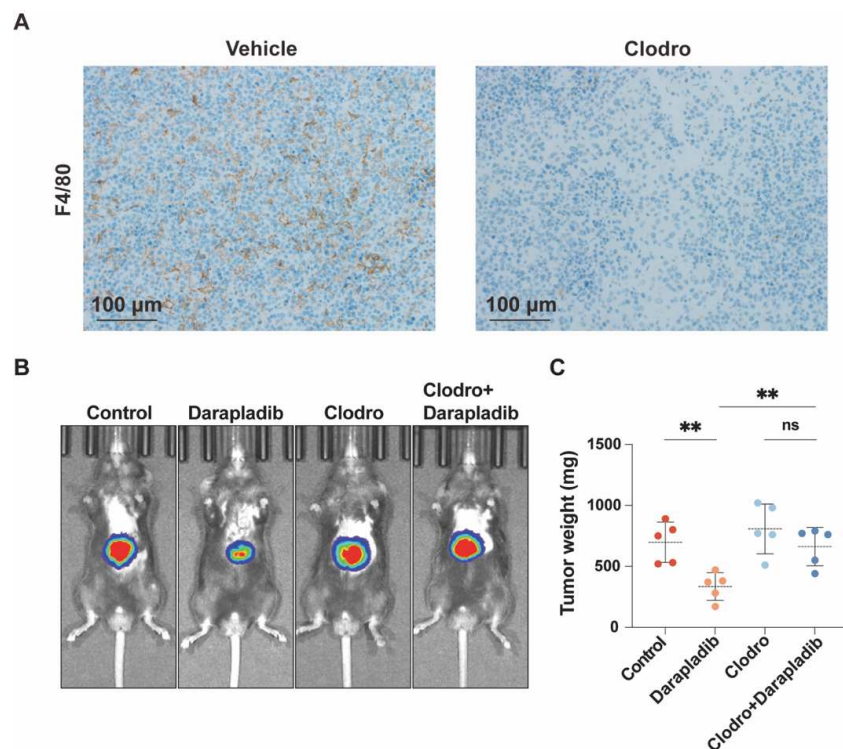

**Supplementary Figure 14. Depletion of macrophages abolishes the anti-tumor effects of**

**Darapladib.** (A) Representative IHC images depicting F4/80<sup>+</sup> macrophages in murine HCC tumors treated with either vehicle or clodronate liposomes. Scale bar: 100  $\mu$ m. (B-C) Murine orthotopic HCC treated with either vehicle or Darapladib in control or macrophage-depleted mice. Representative bioluminescence images and statistical diagram illustrating tumor weights are presented (n=5, each). Student's t-test. Data was presented as mean with SD. ns, no significance; \*\*p<0.01. IHC: immunohistochemistry; HCC: hepatocellular carcinoma; SD: standard deviation.

### Supplementary Tables

**Table S1. Primers used for quantitative real-time PCR in this study**

| Name           | Forward Sequence (5' to 3') | Reverse Sequence (3' to 5') |
|----------------|-----------------------------|-----------------------------|
| $\beta$ -actin | GGCTGTATTCCCCTCCATCG        | CCAGTTGGTAACAATGCCATGT      |
| Arg            | CTCCAAGCCAAAGTCCTTAGAG      | AGGAGCTGTCATTAGGGACATC      |
| Fizz           | CCAATCCAGCTAACTATCCCTCC     | ACCCAGTAGCAGTCATCCCA        |
| Il10           | GCTCTTACTGACTGGCATGAG       | CGCAGCTCTAGGAGCATGTG        |
| Il1b           | GCAACTGTTCTGAACTCAACT       | ATCTTTTGGGGTCCGTCAACT       |
| Il6            | TAGTCCTTCCTACCCCAATTTCC     | TTGGTCCTTAGCCACTCCTTC       |
| Il12           | TGGTTTGCCATCGTTTTGCTG       | ACAGGTGAGGTTCACTGTTTCT      |
| Tnf $\alpha$   | CCCTCACACTCAGATCATCTTCT     | GCTACGACGTGGGCTACAG         |

**Table S2. Antibodies used for Western blot analysis**

| Antibody                            | Catalogue number | Company                   |
|-------------------------------------|------------------|---------------------------|
| Anti-PLA2G7                         | #15526-1-AP      | Proteintech               |
| Anti-Phospho-Ikk $\alpha$ / $\beta$ | #2697            | Cell Signaling Technology |
| Anti-Ikk $\beta$                    | #2370            | Cell Signaling Technology |
| Anti-Phospho-NF- $\kappa$ B p65     | #3033            | Cell Signaling Technology |
| Anti-NF- $\kappa$ B p65             | #8242            | Cell Signaling Technology |
| Anti-NF- $\kappa$ B p50             | #12540           | Cell Signaling Technology |
| Anti-Phospho-p44/42 MAPK (Erk1/2)   | #4370            | Cell Signaling Technology |
| Anti-p44/42 MAPK (Erk1/2)           | #4695            | Cell Signaling Technology |
| Anti-Phospho-SAPK/JNK               | #4668            | Cell Signaling Technology |
| Anti-SAPK/JNK                       | #9252            | Cell Signaling Technology |
| Anti-Phospho-p38 MAPK               | #4511            | Cell Signaling Technology |
| Anti-p38 MAPK                       | #8690            | Cell Signaling Technology |
